# Supplementary material for: Deacetylation enhances ParB–DNA interactions affecting chromosome segregation in Streptomyces coelicolor
Source: PubMed Central journal article supplement — Nucleic Acids Res. 2020 Apr 20;48(9):4902–14. doi: 10.1093/nar/gkaa245 (PMC7229854; doi:10.1093/nar/gkaa245), 2020-04-20
Supplement: gkaa245_supplemental_file.pdf [file gkaa245_supplemental_file.pdf]

# 1 Supplemental Information

## 3 Supplemental Experimental Procedures

### 4 Materials

5 *S. coelicolor* M145 and their derivatives were cultured on MS solid medium or as  
6 indicated at 30 °C. *E. coli* DH5 $\alpha$  and *E. coli* BL21 (DE3) were cultured in LB medium at 37 °C,  
7 and they were the host strains for standard plasmid manipulation and protein expression,  
8 respectively. The methylation-deficient *E. coli* strain ET12567 was used to propagate DNA into  
9 *S. coelicolor* A3(2).

### 11 Generation of *S. coelicolor* PL138, PL139 and PL140

12 First, the DNA sequence of *parB-his* was amplified from *S. coelicolor* genomic DNA  
13 with a 12 $\times$  His sequence embedded in the PCR primer. Then, the resistance gene *aac(3)IV* was  
14 integrated into *parB-his* fragment as a selective marker by overlapping PCR. The *parB* gene  
15 was finally replaced by *parB-his-aac(3)IV* in the chromosome by homologous recombination  
16 (1) generating *S. coelicolor* PL138 [*SCO3887::parB-his-aac(3)IV*]. Based on *S. coelicolor*  
17 PL138, another two ParB expression strains were created by further deletion of *Scpat* or  
18 *SccobB1*. Briefly, the gene encoding *Scpat* or *SccobB1* was in-frame replaced by a kanamycin  
19 resistance cassette within a cosmid (thiostrepton resistance) first. The resulting cosmids were  
20 inserted into *S. coelicolor* PL138 strain to induce double exchanges by homologous  
21 recombination (*tsr*<sup>s</sup>, *kan*<sup>r</sup>). The positive strains were verified by PCR and named as PL139  
22 [*Scpat::neo; SCO3887::parB-his-aac(3)IV*] or PL140 [*SccobB1::neo; SCO3887::parB-his-*  
23 *aac(3)IV*].

### 25 Measurement of growth curve for the wild-type and PL138 *S. coelicolor*

26 For the determination of growth curves, fresh spores from the wild-type and PL138 *S.*  
27 *coelicolor* were diluted to the same amount (OD<sub>600</sub> = 1.5, 100  $\mu$ l) and pre-germinated in  
28 400 $\mu$ l LB liquid medium at 50 °C for 10 min. Then, a total of 500  $\mu$ l spores of each strain  
29 were grown on MS agar plates (diameter 150 mm) covered with sterile plastic cellophane at  
30 30 °C and harvested at different time points (24, 30,36, 48, 60, 72 and 84 h). Cells were dried

31 at 65 °C for 2 days to measure the dry weights of samples.

32

### 33 **Expression and purification of ScPat, ScCobB1, ScCobB2, ParB, and ParB derivatives**

34 The gene coding sequences for *ScPat*, *ScCobB1*, *ScCobB2*, and *ParB* were amplified  
35 from *S. coelicolor* genomic DNA with corresponding primers. DNA fragments of *Scpat*,  
36 *SccobB1*, and *SccobB2* were digested by *EcoR* I and *Xho* I, and ligated to pET28b to construct  
37 the expression vectors. For heterologous expression of *ParB*, the *parB* DNA fragment was  
38 digested with *EcoR* I and *Xba* I, and then ligated to pET28b to construct pET28b-*parB*. The  
39 expression vectors for *ParB*<sup>K183Q</sup>, *ParB*<sup>K183R</sup>, *ParB*<sup>K183A</sup>, *ParB*<sup>K187Q</sup>, *ParB*<sup>K187R</sup>, and *ParB*<sup>K187A</sup>  
40 were built by site-directed mutagenesis Kit (Thermo Fisher, USA), using pET28b-*parB* as the  
41 template. Primer sequences are listed in Table S3.

42 All these plasmids were transformed into the *E. coli* BL21 (DE3). The correct  
43 monoclones were grown overnight in 5 ml LB medium containing kanamycin (50 µg mL<sup>-1</sup>),  
44 and then subcultured into 500 ml LB liquid medium. When the OD<sub>600</sub> reached to 0.6, cells were  
45 translocated to 16 °C and the corresponding proteins were induced with 0.5 mM IPTG for 12  
46 hours. The purification process for these proteins was the same as the endogenous *ParB*  
47 purification.

48

### 49 **Western blotting detection**

50 Standard western blotting procedures were followed for the detection of acetylation  
51 level of *ParB* and *ParB* variants. Briefly, the proteins were separated by SDS-PAGE (10% or  
52 12% acrylamide) and then transferred to a nitrocellulose membrane. For western blotting, 100  
53 mM Tris-HCl (pH 7.5) with 0.5% (v/v) Tween-20 and 1% peptone (AMRESCO) was used for  
54 blocking buffer and 100 mM Tris-HCl (pH 7.5) with 0.05% (v/v) Tween-20 and 0.1% peptone  
55 was used for primary and secondary antibody buffers. The nitrocellulose membrane was treated  
56 with an ECL western blotting Kit (GE Healthcare) and visualized using an ImageQuant LAS  
57 4000 mini (GE Healthcare) equipped with the ImageQuant TL software (GE Healthcare).  
58 Unless otherwise indicated, coomassie blue staining was used for the loading control.

59

### 60 ***In vitro* acetylation and deacetylation of ParB peptides**

61 The *in vitro* peptide acetylation system contains 50 mM Tris-HCl (pH 8.0), 1.55  $\mu$ M  
62 *ScPat* and 295  $\mu$ M peptide ParB<sup>K183</sup>, in the presence or absence of 0.2 mM acetyl-CoA. The *in*  
63 *vitro* peptide deacetylation system contains 50 mM Tris-HCl (pH 8.0), 6.0 mM MgCl<sub>2</sub>, 6.0  $\mu$ M  
64 *ScCobB1* or 7.5  $\mu$ M *ScCobB2* and 1.43 mM peptide ParB<sup>K183Ac</sup>, in the presence or absence of  
65 1.0 mM NAD<sup>+</sup>. The reactions were performed in a 50  $\mu$ l volume at 30°C for 2 hours, and  
66 terminated by adding 1% (v/v) trifluoroacetic acid (TFA). After treatments, samples were  
67 centrifuged at 15,000  $\times g$  for 10 mins, and the supernatants were analyzed *via* HPLC using the  
68 Aeris peptide XB-C18 column (150  $\times$  4.6 mm, 3.6  $\mu$ m; Phenomenex).

69

### 70 **Construction of fluorescent ParB and ParB variants in *S. coelicolor***

71 To monitor the formation of ParB segregation complex in *S. coelicolor*, an integration  
72 plasmid encoding the in-fusion ParB-eGFP protein was generated and propagated into *S.*  
73 *coelicolor* chromosome. Specifically, the *parB-egfp* fragment including the native *parAB*  
74 promoter (containing both *parABp*<sub>1</sub> and *parABp*<sub>2</sub>) was fused by overlapping PCR. The stop  
75 codon of *parB* gene was replaced by the linker sequence ‘tctagaggctgccac’. The fused *parABp-*  
76 *parB-egfp* fragment was digested by *Bgl* II and *Not* I and then ligated into pSET152a plasmid.  
77 The resulting plasmid was propagated into the *S. coelicolor* cells (WT,  $\Delta$ *parb*,  $\Delta$ *Scpat*,  
78  $\Delta$ *SccobB1*, or  $\Delta$ *SccobB2*) and integrated at the *attB* sites of their chromosomes, respectively.  
79 Using the plasmid of pSET152a-*parB-eGFP* as the template, ParB<sup>K183Q</sup>-eGFP and ParB<sup>K183R</sup>-  
80 eGFP were built by site-directed mutagenesis Kit (Thermo Fisher, USA). These three plasmids  
81 were propagated into *S. coelicolor*  $\Delta$ *parb* strain and integrated into the chromosome, generating  
82  $\Delta$ *parB(parB-egfp)*,  $\Delta$ *parB(parB<sup>K183Q</sup>-egfp)* and  $\Delta$ *parB(parB<sup>K183R</sup>-egfp)* strains, respectively. We  
83 further built  $\Delta$ *SccobB1 $\Delta$ *parB (parB<sup>K183R</sup>-egfp)* strain by deletion of *SccobB1* gene based on  
84  $\Delta$ *parB(parB<sup>K183R</sup>-egfp)* cell using the PCR-targeted method (1).*

85 The correct clones were selected by flooding the MS solid plates with thiostrepton (10  
86  $\mu$ g mL<sup>-1</sup>) after 16 hours’ culture, and confirmed by cloning PCR. To determine the expression  
87 level of the fluorescent ParB or ParB variants, cells were harvested by centrifuging at 6000  $\times g$   
88 for 10 mins and resuspended in cold Tris-HCl buffer (50 mM, pH 8.0) containing NaCl (500  
89 mM), imidazole (10 mM), EDTA (1 mM) and phenylmethanesulfonyl fluoride (1 mM). Then,  
90 cells were disrupted by an EmulsiFlex-C5 cell disruptor and the collected supernatants were

91 performed western blotting with an anti-eGFP antibody.

92

### 93 **Scanning electron microscopy**

94 The wild-type,  $\Delta Scpat$ ,  $\Delta SccobB1$ ,  $\Delta SccobB2$ , and  $\Delta parB$  *S. coelicolor* strains were  
95 inoculated on MS agar with inserted coverslips and then incubated at 30 °C for 4 days. After  
96 rapid dehydration with a graded ethanol series (70, 80, 90, 95, and 100%) and concentrated  
97 amyl acetate, the samples were dried with the HCP-2 critical point dryer (Hitachi, Tokyo,  
98 Japan) according to the supercritical drying method. The cells were subsequently coated with  
99 gold using the JFC-1600 Auto Fine Coater (Jeol, Tokyo, Japan) and then examined using a  
100 JSM-6360LV scanning electron microscope (Jeol, Tokyo, Japan).

101

### 102 **Real-Time PCR**

103 The *S. coelicolor* wild-type strain was cultured under the same condition as described  
104 in growth curve measurement. Cells were collected by centrifugation at the time points of 24,  
105 30, 36, 48, 60, 72 and 84 h, respectively, and were stored in liquid nitrogen immediately. The  
106 total RNA was extracted by using TRIzol (Thermo Fisher Scientific) and the SV Total RNA  
107 Isolation System (Promega). DNA was removed by digestion with recombinant DNase I  
108 (TaKaRa). The cDNA synthesis was executed by using the PrimeScript™ 1st Strand cDNA  
109 Synthesis Kit (TaKaRa) in a 20 µl reaction system. Real-time PCR assay was carried out with  
110 SYBRR Premix Ex Taq™ II (TaKaRa) according to the manufacturer's instructions. At least  
111 three independent samples were tested, the transcription of *hrdB* was used as an internal  
112 control. The relative transcript levels of tested genes were normalized to *hrdB* gene  
113 transcription and determined using the  $2^{-\Delta\Delta CT}$  method.

114

115

116 Supplemental Figures

117

118 Figure S1

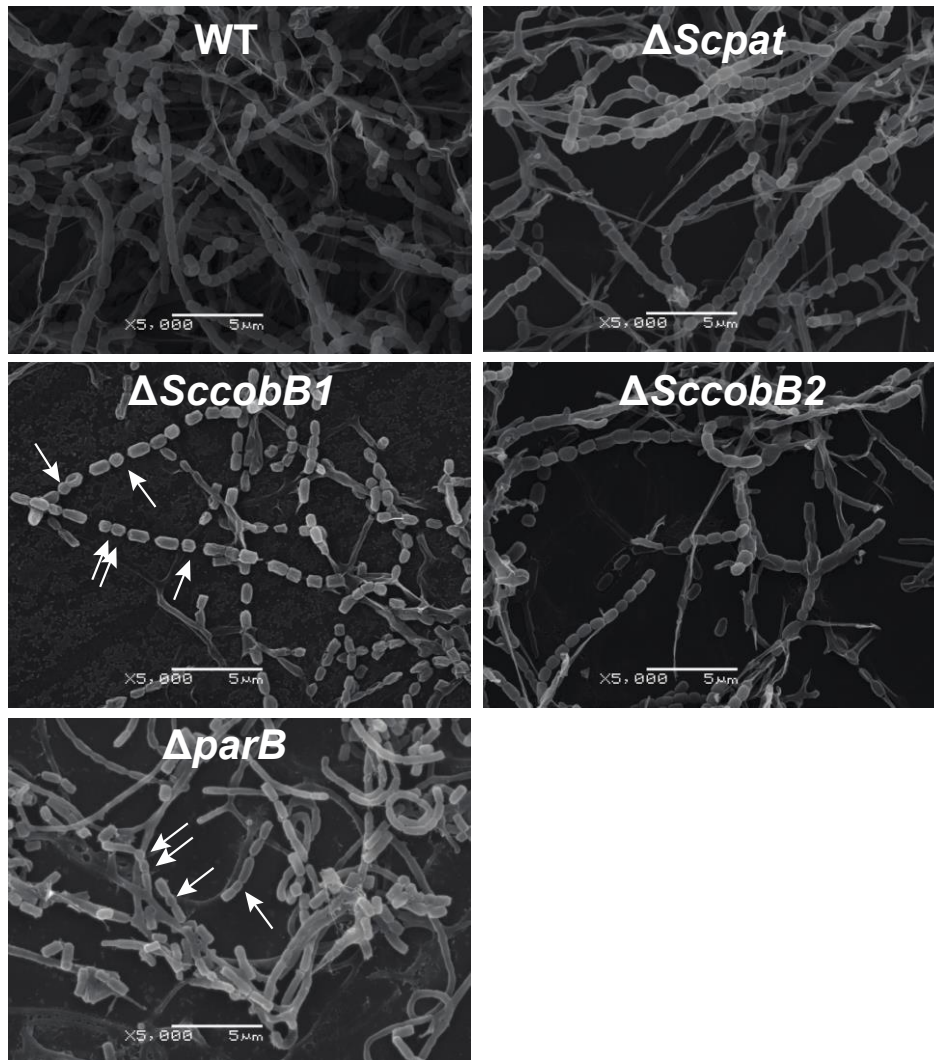

119

120 **Figure S1. Scanning electron microscopy analysis reveals that  $\Delta ScobB1$  produces**  
121 **abnormal spores.** The wild type,  $\Delta Scpat$ ,  $\Delta SccobB1$ ,  $\Delta SccobB2$ , and  $\Delta parB$  of *S. coelicolor*  
122 cells were inoculated onto the acute-angled junction of coverslips that inserted on MS solid  
123 medium for 3 days and performed for SEM imaging. Arrows point out some abnormal spores  
124 with relatively smaller sizes were found in  $\Delta SccobB1$  and  $\Delta parB$ . (Scale bars, 5  $\mu$ m.)

125

126

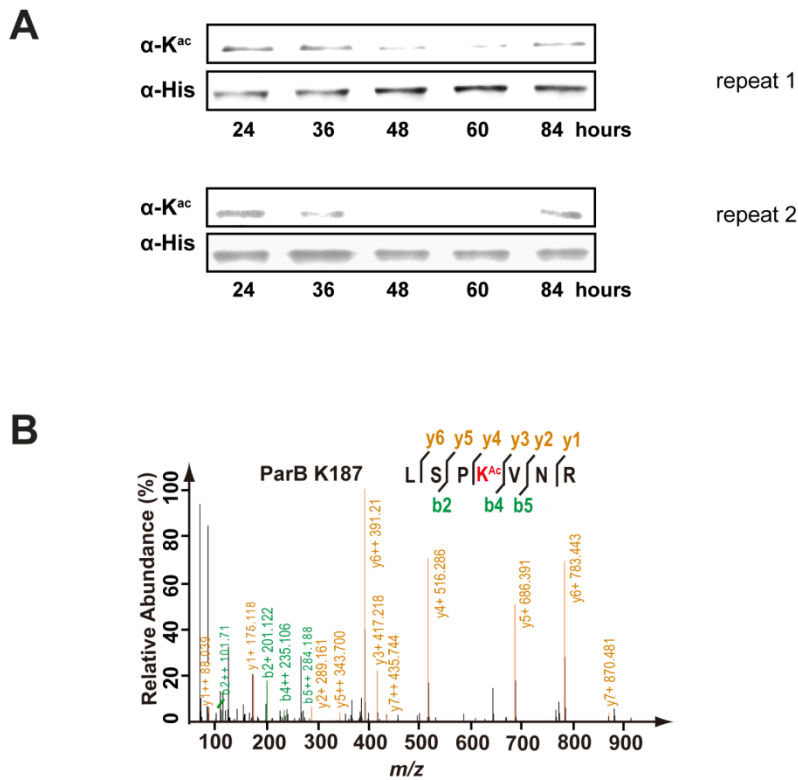

128

129 **Figure S2.** (A) The acetylation level of *S. coelicolor* ParB decreases after a 48-h cultivation  
 130 (corresponding to Figure 1B). Two independent results of triplicates were shown here. Cells  
 131 from the *S. coelicolor* PL138 [*SCO3887::parB-his-aac(3)IV*] were grown on MS solid  
 132 medium and their ParB acetylation levels were analyzed at different time points (1.0, 1.5, 2.0,  
 133 2.5, and 3.5 days). The acetylation level was determined by western blot using the anti-  
 134 acetyllysine antibody and visualization the proteins using the anti-His antibody.  
 135 (B) HPLC/MS-MS analysis identified Lys-187 as one of the other ParB acetylation site  
 136 (corresponding to Figure 1D). The ParB protein isolated from *S. coelicolor* after a 36-h  
 137 cultivation was digested and subjected to HPLC/MS-MS analyses.

138

139

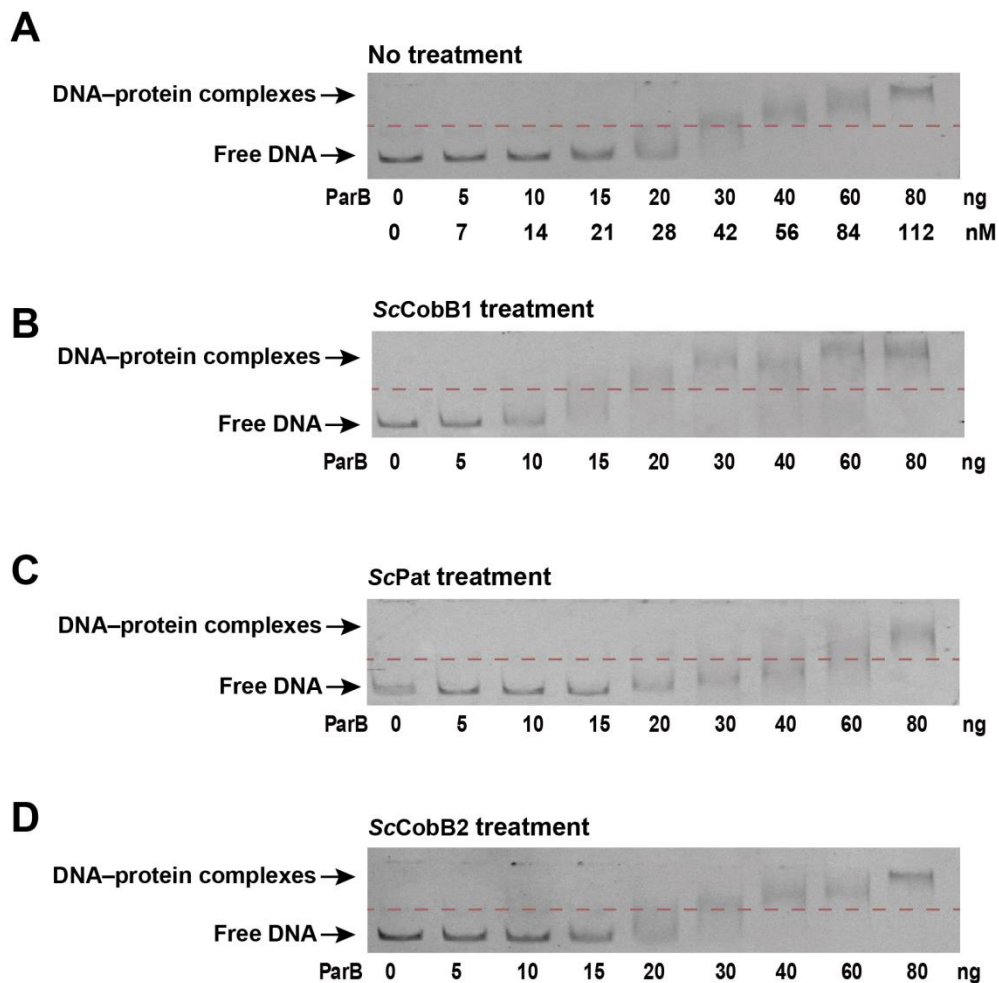

141

142 **Figure S3. Deacetylation increases the DNA-binding affinity of ParB to *parS* while**  
 143 **acetylation decreases its DNA-binding affinity to *parS* (corresponding to Figure 3D). A**  
 144 **series of EMSAs were completed by incubating *parS* with varying concentrations of ParB**  
 145 **proteins (0–112 nM), which were pre-treated with ScPat, ScCobB1, or ScCobB2. Free DNA**  
 146 **and DNA bound (indicated by arrows) were separated by 5% polyacrylamide gel**  
 147 **electrophoresis. The ParB protein without any treatment was used as the control. The**  
 148 **background-subtracted signal intensity was measured, and the binding constant  $K_D$  was**  
 149 **calculated based on these results.**

150

151

152 **Figure S4**

153

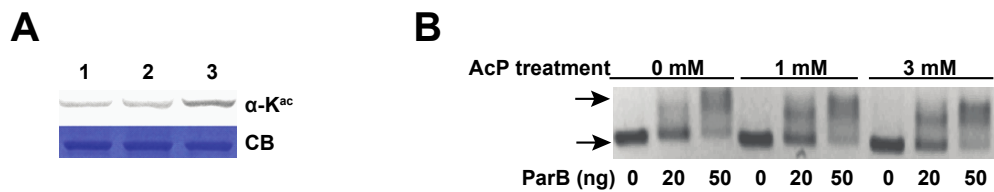

154

155 **Figure S4. The acetylation by AcP is not specific to the lysine site(s) pivotal for ParB**

156 **binding activity.** (A) ParB proteins were incubated with 0 mM (line 1), 1 mM (line 2), 3 mM

157 (line 3) acetyl-phosphate for 2 hours, respectively, and then performed western blotting using

158 pan-anti-acetyllysine antibody. The coomassie blue staining (CB) of ParB was set as the

159 loading control. (B) EMSA assay was carried out using a FAM-labelled fragment containing

160 two consecutive *parS* sequences. DNA fragments were incubated with varying concentrations

161 of ParB proteins (0-50 ng), which were pre-treated by indicated acetyl-phosphate. Free DNA

162 and DNA-protein complexes (shown by arrow, respectively) were separated in 2% agarose

163 gel ( $0.25 \times \text{TBE}$ , at  $20 \text{ V cm}^{-1}$ ,  $4 \text{ }^\circ\text{C}$ ).

164



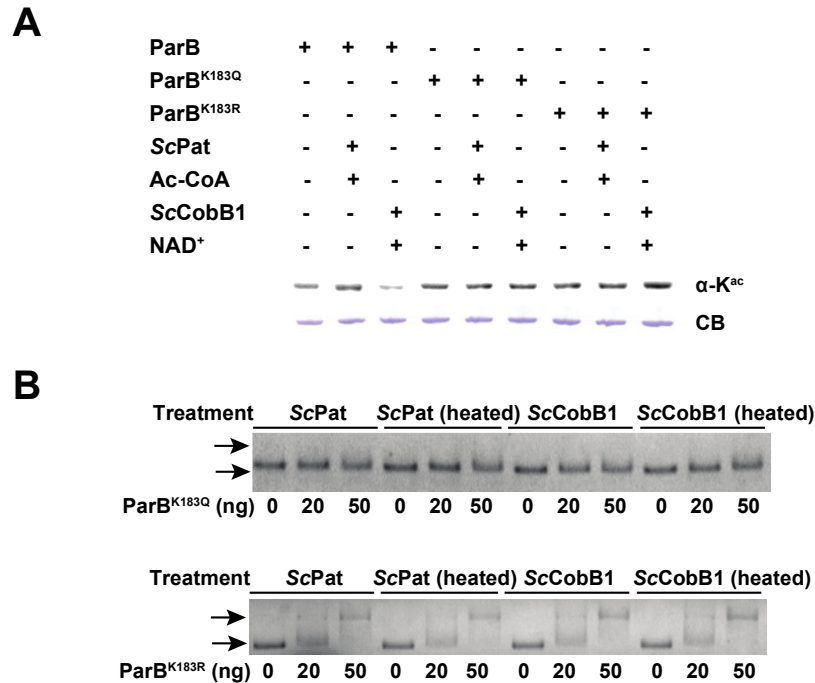

166

167 **Figure S5. Neither the acetylation level nor the DNA-binding affinity of ParB variants at**

168 **Lys-183 is altered in response to ScPat or ScCobB1 treatment.** (A) ParB and ParB variants

169 (ParB<sup>K183Q</sup> and ParB<sup>K183R</sup>) were incubated with ScPat in presence of acetyl-CoA, or ScCobB1

170 in presence of NAD<sup>+</sup>. The acetylation level of ParB was determined by western blotting using

171 a pan-anti-acetyllsine antibody. The coomassie blue staining (CB) of ParB was set as the

172 loading control. (B) ParB<sup>K183Q</sup> and ParB<sup>K183R</sup> were incubated with active ScPat (or ScCobB1)

173 or heat-inactivated ScPat (or ScCobB1). EMSA assays were carried out using a FAM-labelled

174 fragment containing two consecutive *parS* sequences. DNA fragments were incubated with

175 varying concentrations of pre-treated ParB variants (0-50 ng). Free DNA and DNA-protein

176 complexes (shown by arrow, respectively) were separated in 2% agarose gel (0.25 × TBE, at

177 20 V cm<sup>-1</sup>, 4 °C).

178

179

180

181

182

183

184 **Figure S6**

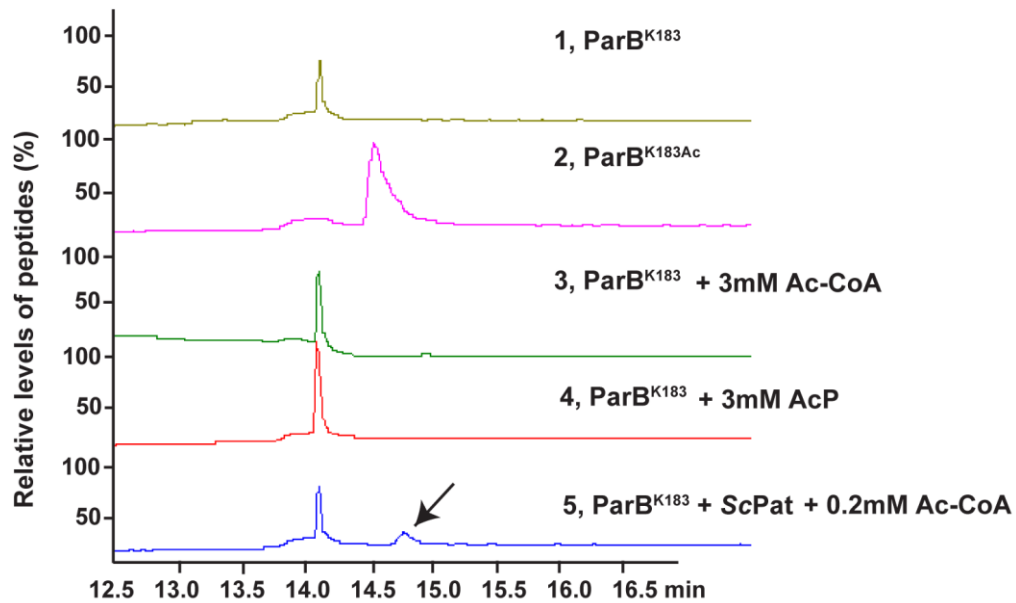

185

186 **Figure S6. Treatments with high concentration of Acetyl phosphate (AcP) or acetyl-CoA**  
187 **(Ac-CoA) failed to acetylate ParB<sup>K183</sup> peptide.** The ParB peptide with an acetylated Lys-183  
188 residue were synthesized and incubated with 3 mM Ac-CoA, 3 mM AcP or 0.2 mM Ac-CoA  
189 in present of ScPat at 30 °C for 2 h. Reactions were terminated by adding 1% TFA, after which  
190 the samples were analyzed by HPLC. The arrow indicates the retention time of the acetylated  
191 ParB peptide (ParB<sup>K183Ac</sup>).  
192

193 **Figure S7**

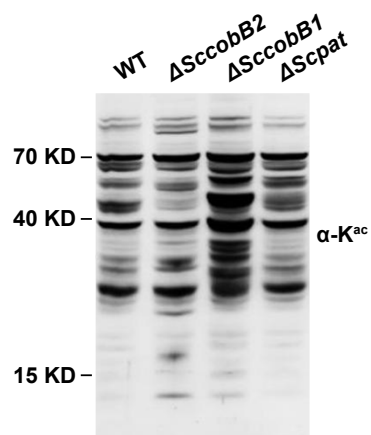

194

195 **Figure S7. *ScCobB1* has a global regulatory role in *S. coelicolor* acetylome.** Western blot  
196 was used to examine the whole protein extracts from the wild-type,  $\Delta$ Scpat,  $\Delta$ SccobB1, and  
197  $\Delta$ SccobB2 cells after a 48-h cultivation in TSB liquid medium.

198

199

200

201 **Figure S8**

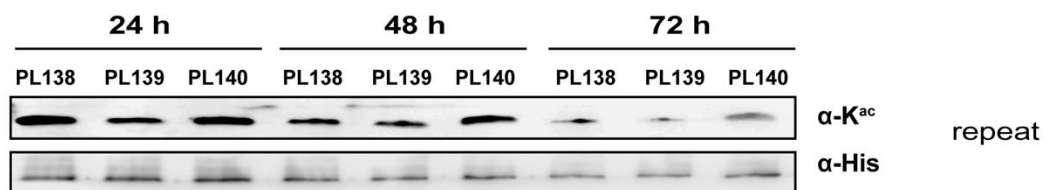

202

203 **Figure S8. The acetylation level of ParB-His proteins from PL138 (WT), PL139 ( $\Delta\text{Scpat}$ ),**  
204 **and PL140 ( $\Delta\text{SccobBI}$ ) at different time points grown in TSB liquid medium**  
205 **(corresponding to Figure 5). One independent results of two replicates was shown here. The**  
206 **acetylation level was determined by western blot using the anti-acetyllysine antibody and**  
207 **visualization the proteins using the anti-His antibody.**

208

209

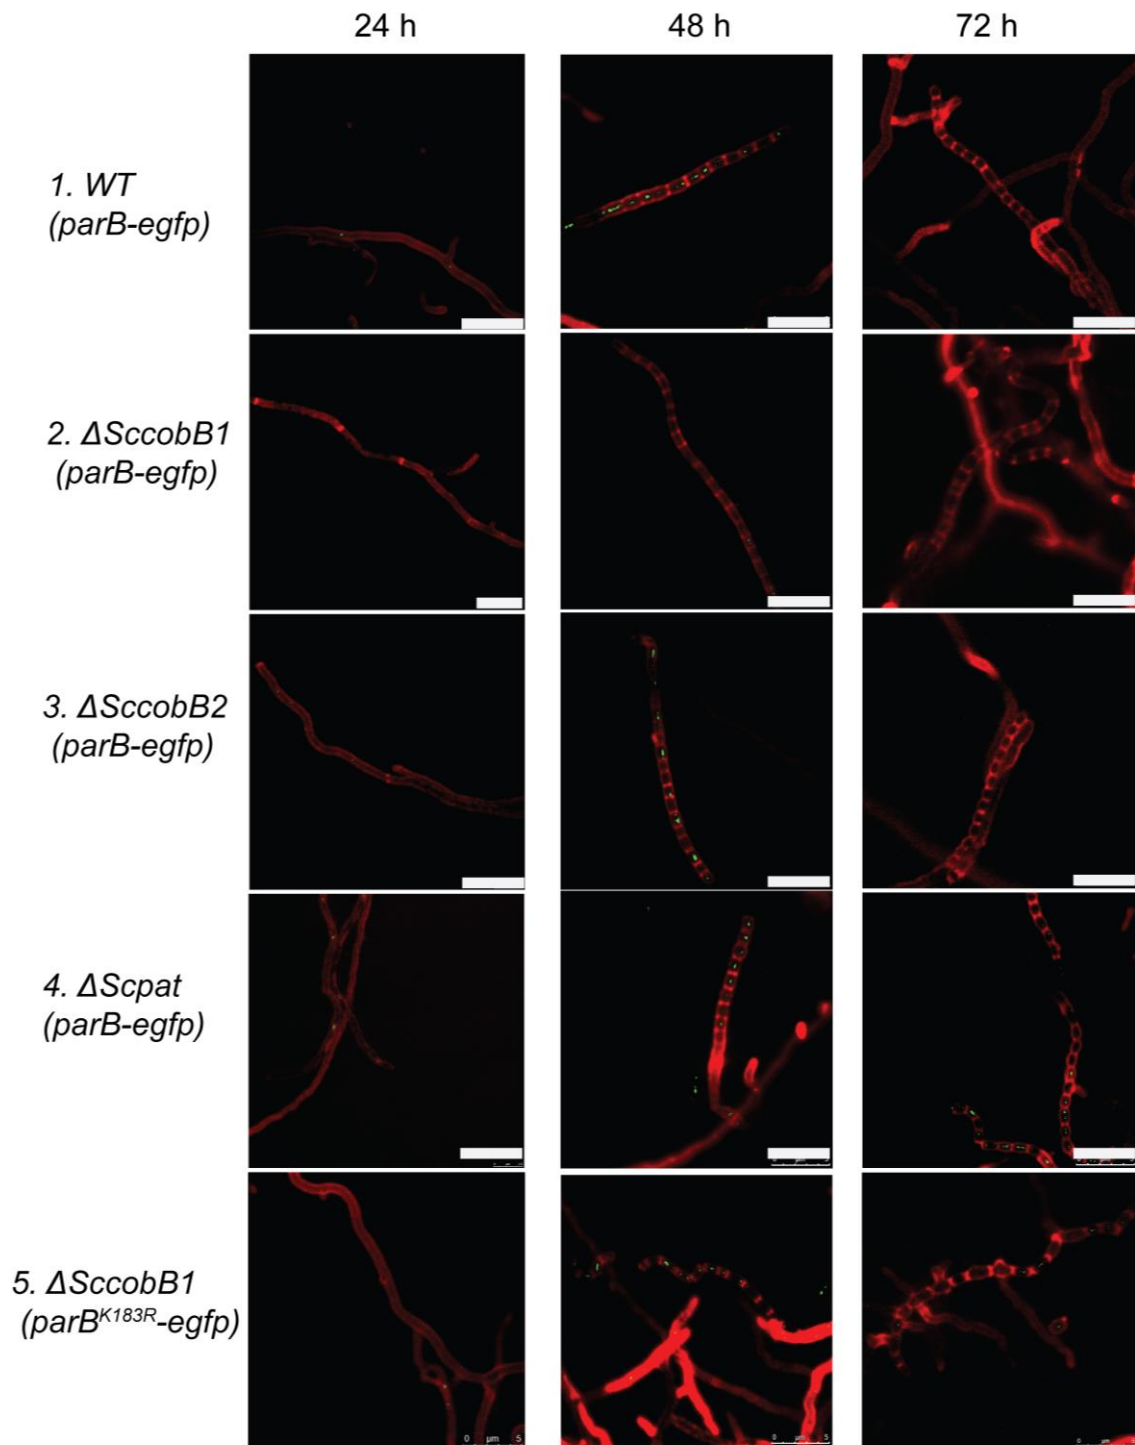

211

212 **Figure S9.** The formation of ParB segregation complexes at different growth time in *S.*

213 *coelicolor* strains. Fluorescent microscopy was performed for wild-type,  $\Delta$ *SccobB1*,

214  $\Delta$ *SccobB2*,  $\Delta$ *Scpat* and  $\Delta$ *SccobB1*(*parB<sup>K183R</sup>*) strains. Representative images were displayed

215 for the cells collected at indicated time (24, 48, and 72 h) cultured on MS solid medium. Cell  
216 wall (red) and ParB segregation complex (green) were showed. All scale bars, 5  $\mu$ m.  
217  
218

219 **Figure S10**

220

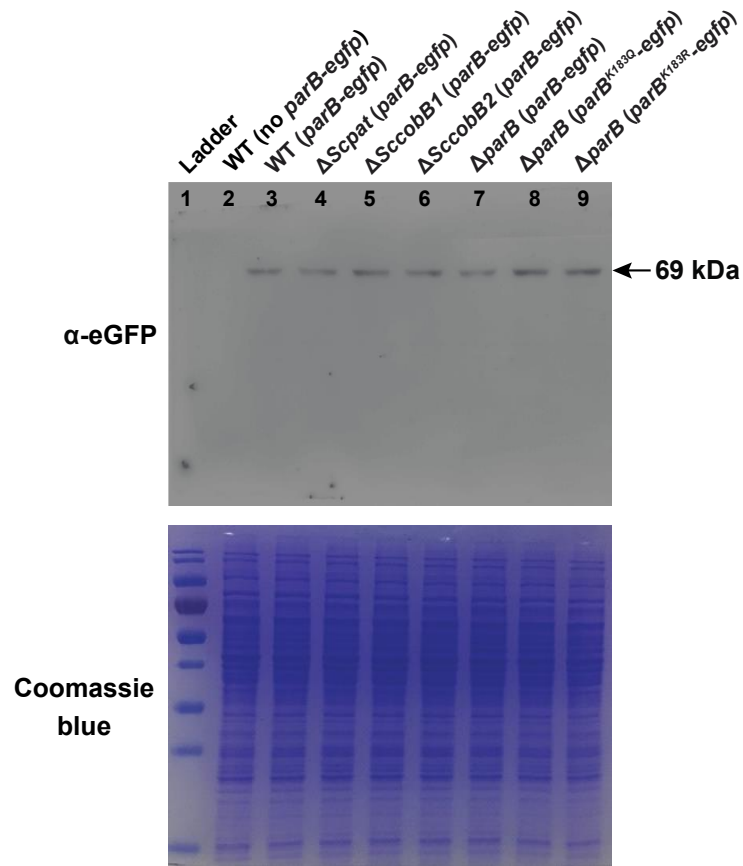

221

222 **Figure S10. Western blotting analysis indicates the expression levels of ParB and ParB**

223 **variants are similar among different *S. coelicolor* cells.** The expression levels of ParB

224 proteins were determined by detecting the abundance of ParB-eGFP with an anti-eGFP

225 antibody in *S. coelicolor* strains after a 48-hour cultivation. The expression levels of ParB

226 variants, *i.e.*, ParB<sup>K183Q</sup>-eGFP and ParB<sup>K183R</sup>-eGFP, were also determined. Their coomassie

227 blue staining of the whole protein extracts were set as the loading control.

228

229

230

231

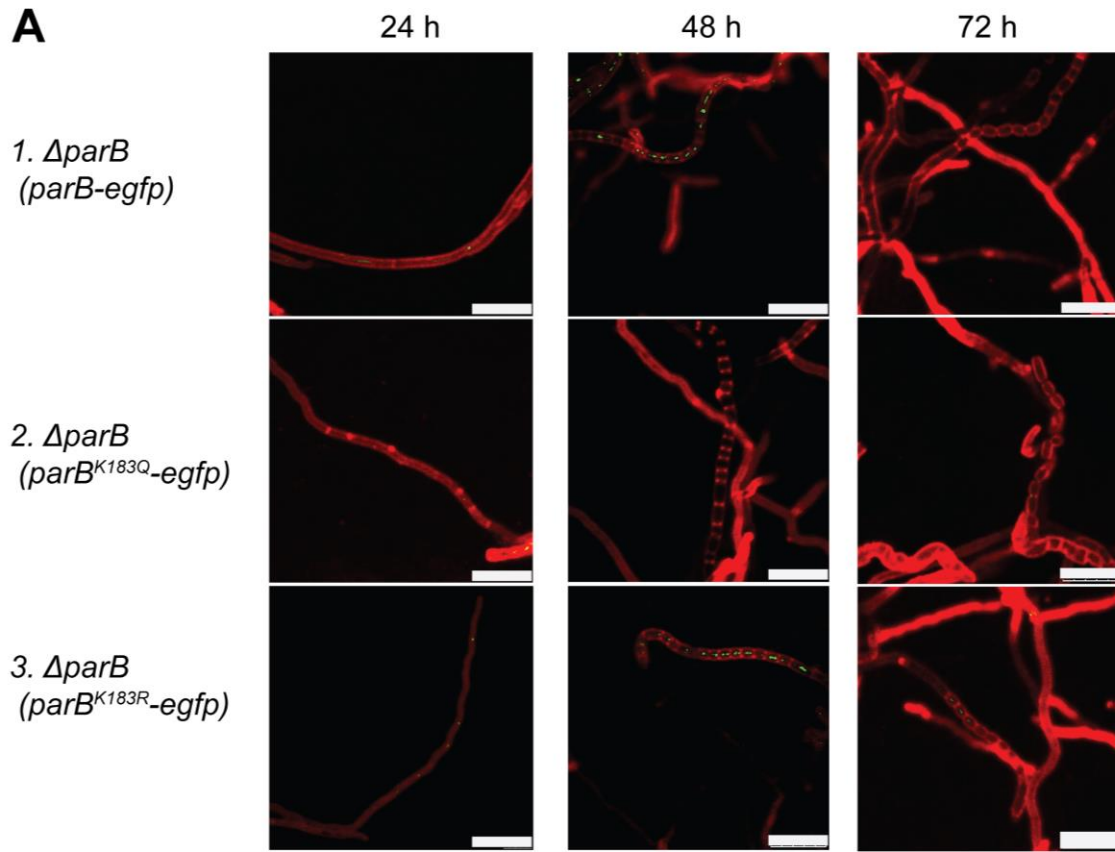

**B**

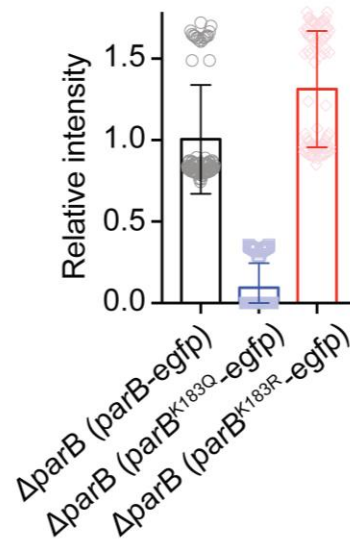

233

234 **Figure S11. ParB<sup>K183R</sup>-eGFP forms ParB segregation complex while ParB<sup>K183Q</sup>-eGFP**

235 **fails to form bright segregation foci.** Fluorescent microscopy was performed for ParB-

236 eGFP, ParB<sup>K183Q</sup>-eGFP and ParB<sup>K183R</sup>-eGFP in *S. coelicolor*  $\Delta parB$  strains. (A) Images of the

237 cells cultured on MS solid medium at indicated hours (24, 48, and 72 h). Cell wall (red) and



238 ParB segregation complex (green) were showed. All scale bars, 5  $\mu$ m. (B) The focus  
239 intensities were quantified by measurement of the average fluorescence signal for the 48-h  
240 cultivated aerial hyphae. The value of background-subtracted signal intensity was calculated  
241 by ImageJ and normalized against the cell number (150 cells from each sample). The value of  
242 the  $\Delta parB$  (*parB-egfp*) sample at 48 h growth stage was set as 100%.

243

244

245

246

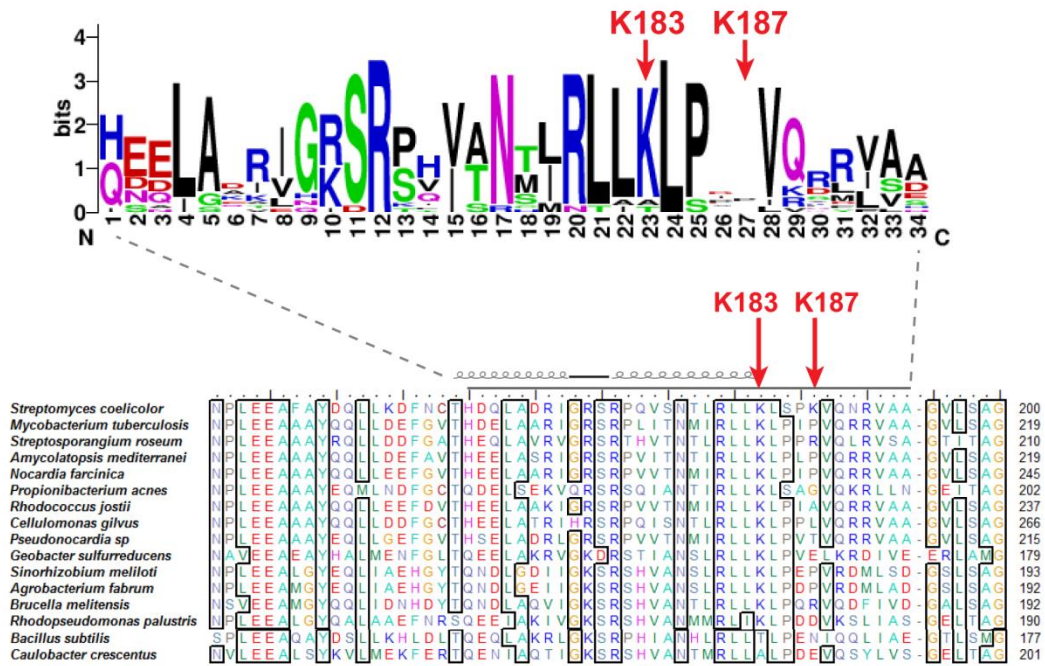

248

249 **Figure S12. The ParB Lys-183 is conserved among most actinobacteria and some**  
 250 **representative proteobacteria.** Sequences including the HTH DNA-binding motifs (amino  
 251 acids 161–194 in *S. coelicolor* ParB) were compared using WebLogo  
 252 (<http://weblogo.berkeley.edu/logo.cgi>) and are graphically represented in the top panel.  
 253 Sequence alignments of the ParB HTH DNA-binding motif from different bacterial species  
 254 are provided in the lower panel. The numbers to the right of the panel represent the  
 255 corresponding amino acid positions in the ParB proteins from different organisms. Red  
 256 arrows indicate K183 and K187 of *S. coelicolor* ParB. The following sequences were  
 257 acquired from the KEGG database: *Streptomyces coelicolor* SCO3887; *Mycobacterium*  
 258 *tuberculosis* HKBT2\_4143; *Streptosporangium roseum* Sros\_9383; *Amycolatopsis*  
 259 *mediterranei* AMED\_9359; *Nocardia farcinica* nfa56660; *Propionibacterium acnes*  
 260 TIA1EST1\_11540; *Rhodococcus jostii* RHA1\_ro03654; *Cellulomonas gilvus* Celgi\_3200;  
 261 *Pseudonocardia* sp. AD017\_13410; *Geobacter sulfurreducens* GSU0107; *Sinorhizobium*  
 262 *meliloti* SMc02801; *Agrobacterium fabrum* Atu2828; *Brucella melitensis* BMEI0010;

263 *Rhodopseudomonas palustris* RPA0291; *Bacillus subtilis* BSU40960 (Spo0J); and

264 *Caulobacter crescentus* CCNA\_03868.

265

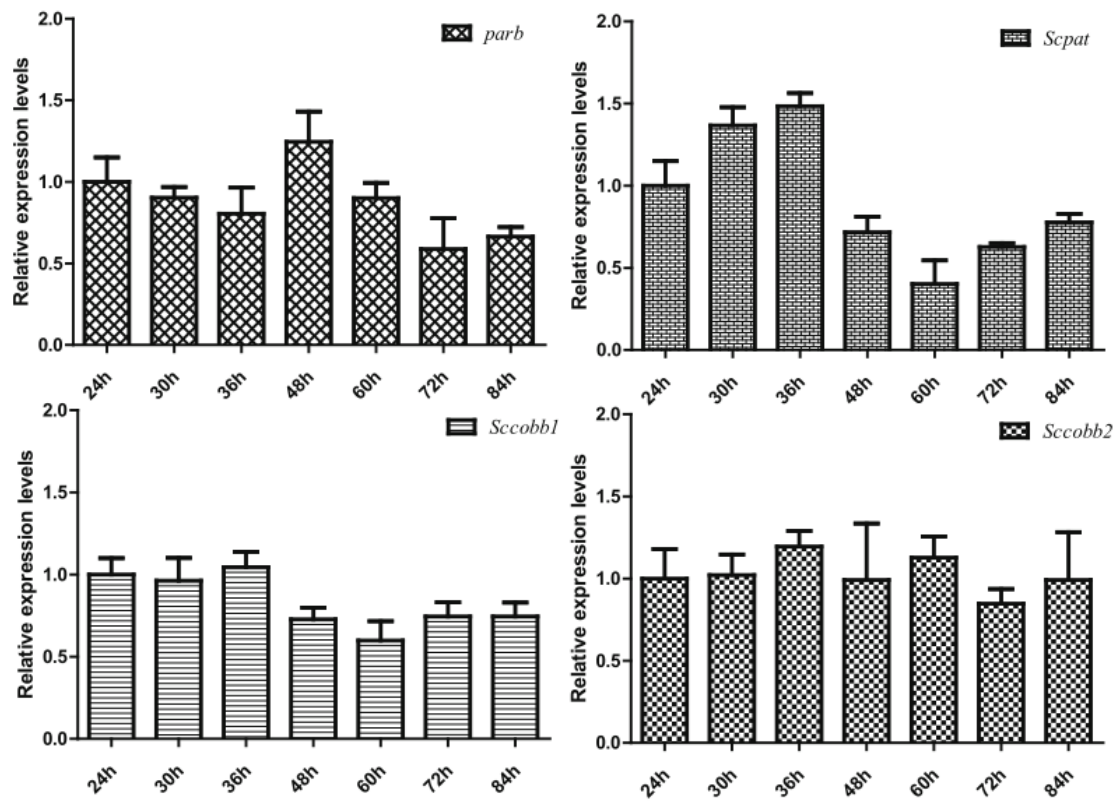

267

268 **Figure S13. Transcriptional profiles of selected genes throughout *S. coelicolor* life cycle.**269 qPCR analysis of the transcriptional expression profiles of *parb*, *Scpat*, *Sccob1* and *Sccob2*270 genes in wild type *S. coelicolor* on MS solid medium. The relative transcript levels of these271 genes were obtained individually after normalization to the internal reference *hrdB* at the

272 indicated time points. The data show that the transcriptional levels of these genes were barely

273 changed ( $\leq 3$  folds) during the cell cycle. The relative value for the expression of each gene at

274 24 h was arbitrarily assigned as value 100%. Error bars indicate the standard deviation from

275 three independent biological replicates.

276

277 **Figure S14**  
278

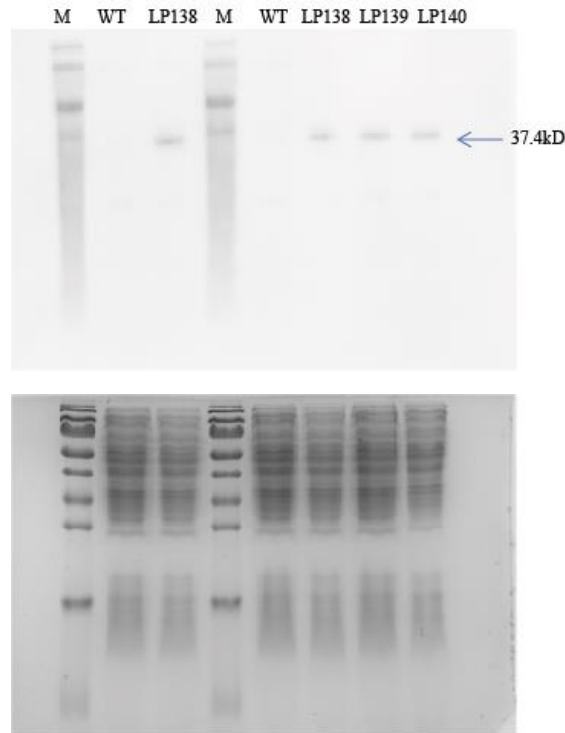

279

280

281 **Figure S14. Western blotting analysis indicates ParB-His is specifically detected by the**  
282 **anti-His antibody in cells (corresponding to Figure 1 and Figure 5).** The expression of ParB-  
283 His fusion proteins in LP138, LP139 and LP140, and their cell extracts were compared with  
284 that of wild-type cells (no tagged ParB). Their cell extracts were isolated and detected with  
285 anti-His antibody by western blotting (upper panel). The coomassie blue staining of the cell  
286 extracts were set as the loading control (lower panel).

287

288

289

**Table S1. Bacterial strains used in this study.**

| Strains                                                                               | Relevant Genotype                                                                                                                                                                                                                           | Reference                         |
|---------------------------------------------------------------------------------------|---------------------------------------------------------------------------------------------------------------------------------------------------------------------------------------------------------------------------------------------|-----------------------------------|
| <i>E. coli</i> DH5 $\alpha$                                                           | F $\phi$ 80d <i>lacZ</i> $\Delta$ M( <i>lacZYA-argF</i> ) U169<br><i>deoR recA1 endA1 hsdR17</i> (rkmk)<br><i>supE44</i> $\lambda$ <i>thi gyr96 relA1</i>                                                                                   | GIBCO-BRL                         |
| <i>E. coli</i> BL21(DE3)                                                              | F' <i>ompT rB<sup>-</sup>mB<sup>-</sup></i> ( $\lambda$ DE3)                                                                                                                                                                                | Novagen                           |
| <i>E. coli</i> BW25113/pIJ790                                                         | $\Delta$ ( <i>araD-araB</i> )567, $\Delta$ <i>lacZ</i> 4787( <i>::rrnB-4</i> ), <i>lacI</i> p-4000 ( <i>lacIQ</i> ), $\lambda$ ,<br><i>rpoS</i> 369(Am), <i>rph-1</i> , $\Delta$ ( <i>rhaD-rhaB</i> )568, <i>hsdR</i> 514; Cml <sup>R</sup> | Datsenko and Wanner, 2000 (2)     |
| <i>E. coli</i> ET12567/pUZ8002                                                        | Non-methylating, Cml <sup>R</sup> , Kan <sup>R</sup>                                                                                                                                                                                        | Life&Technologies Inc             |
| <i>S. enterica</i> G2466                                                              | Recombinant <i>galE</i> mutant from the wild-type LT2                                                                                                                                                                                       | Hone, D. <i>et al.</i> , 1987 (3) |
| <i>S. enterica</i> G2466 $\Delta$ <i>pat</i>                                          | G2466 <i>pat::cat</i>                                                                                                                                                                                                                       | our lab                           |
| <i>S. enterica</i> G2466 $\Delta$ <i>cobB</i>                                         | G2466 <i>cobB::cat</i>                                                                                                                                                                                                                      | our lab                           |
| <i>S. coelicolor</i> M145                                                             | Wild type, SCP1 <sup>-</sup> , SCP2 <sup>-</sup>                                                                                                                                                                                            | Bentley, 2002 (4)                 |
| <i>S. coelicolor</i> M145 $\Delta$ <i>Scpat</i>                                       | <i>SCO5842::neo</i>                                                                                                                                                                                                                         | This study                        |
| <i>S. coelicolor</i> M145 $\Delta$ <i>SccobB1</i>                                     | <i>SCO0452::aac(3)IV</i>                                                                                                                                                                                                                    | This study                        |
| <i>S. coelicolor</i> M145 $\Delta$ <i>SccobB2</i>                                     | <i>SCO6464::aac(3)IV</i>                                                                                                                                                                                                                    | This study                        |
| <i>S. coelicolor</i> M145 $\Delta$ <i>parB</i>                                        | <i>SCO3887::neo</i>                                                                                                                                                                                                                         | This study                        |
| <i>S. coelicolor</i> M145 $\Delta$ <i>parB</i> ( <i>parB-egfp</i> )                   | <i>SCO3887::neo; attB::parB-egfp-aac(3)IV</i>                                                                                                                                                                                               | This study                        |
| <i>S. coelicolor</i> M145 $\Delta$ <i>parB</i> ( <i>parB<sup>K183Q</sup>-egfp</i> )   | <i>SCO3887::neo; attB::parB<sup>K183Q}-egfp-aac(3)IV</sup></i>                                                                                                                                                                              | This study                        |
| <i>S. coelicolor</i> M145 $\Delta$ <i>parB</i> ( <i>parB<sup>K183R</sup>-egfp</i> )   | <i>SCO3887::neo; attB::parB<sup>K183R}-egfp-aac(3)IV</sup></i>                                                                                                                                                                              | This study                        |
| <i>S. coelicolor</i> M145 ( <i>parB-egfp</i> )                                        | <i>attB::parB-egfp-aac(3)IV</i>                                                                                                                                                                                                             | This study                        |
| <i>S. coelicolor</i> M145 $\Delta$ <i>Spat</i> ( <i>parB-egfp</i> )                   | <i>SCO5842::neo; attB::parB-egfp-aac(3)IV</i>                                                                                                                                                                                               | This study                        |
| <i>S. coelicolor</i> M145 $\Delta$ <i>ScobB1</i> ( <i>parB-egfp</i> )                 | <i>SCO0452::aac(3)IV; attB::parB-egfp-aac(3)IV</i>                                                                                                                                                                                          | This study                        |
| <i>S. coelicolor</i> M145 $\Delta$ <i>ScobB2</i> ( <i>parB-egfp</i> )                 | <i>SCO6464::aac(3)IV; attB::parB-egfp-aac(3)IV</i>                                                                                                                                                                                          | This study                        |
| <i>S. coelicolor</i> M145 $\Delta$ <i>ScobB1</i> ( <i>parB<sup>K183R</sup>-egfp</i> ) | <i>SCO0452::aac(3)IV; attB::parB<sup>K183R}-egfp-aac(3)IV</sup></i>                                                                                                                                                                         | This study                        |
| <i>S. coelicolor</i> M145 $\Delta$ <i>Spat</i> ( <i>parB<sup>K183Q</sup>-egfp</i> )   | <i>SCO5842::neo; attB::parB<sup>K183Q}-egfp-aac(3)IV</sup></i>                                                                                                                                                                              | This study                        |
| PL138                                                                                 | <i>SCO3887::parb-his-aac(3)IV</i>                                                                                                                                                                                                           | This study                        |
| PL139                                                                                 | <i>SCO5842::neo; SCO3887::parb-his-aac(3)IV</i>                                                                                                                                                                                             | This study                        |

PL140

*SCO0452:: ::neo; SCO3887::parb-  
his-aac(3)IV*

This study

---

291

292

**Table S2. Plasmids and Cosmids used in this study.**

| Plasmids                                             | Description                                                                           | Reference          |
|------------------------------------------------------|---------------------------------------------------------------------------------------|--------------------|
| pBluescriptII KS+                                    | Cloning vector for <i>E. coli</i> , Amp <sup>R</sup>                                  | Merck              |
| pSET152a                                             | Chromosome integration vector for <i>S. coelicolor</i> , <i>aac(3)IV</i> , <i>tsr</i> | Kuhstoss, 1991 (5) |
| pET-28b (+)                                          | Expression vector for <i>E. coli</i> , Kan <sup>R</sup>                               | Novagen            |
| pIJ8660                                              | Chromosome integration vector for <i>S. coelicolor</i> , <i>aac(3)IV</i>              | Sun, 1999 (6)      |
| pHY773                                               | Template plasmid for <i>aac(3)IV</i>                                                  | Our lab            |
| pHY779                                               | Template plasmid for <i>neo</i>                                                       | Our lab            |
| Cosmid- <i>ParAB</i>                                 | cosmid containing <i>parA parB</i>                                                    | Qin lab            |
| Cosmid- <i>Pat</i>                                   | cosmid containing <i>Scpat</i>                                                        | Qin lab            |
| Cosmid- <i>CobB1</i>                                 | cosmid containing <i>SccobB1</i>                                                      | Qin lab            |
| Cosmid- <i>CobB2</i>                                 | cosmid containing <i>SccobB2</i>                                                      | Qin lab            |
| Cosmid- <i>ParB-His</i>                              | cosmid containing <i>parB-his-aac(3)IV</i>                                            | This study         |
| Cosmid- $\Delta$ <i>Pat1</i>                         | cosmid containing <i>Scpat::neo</i>                                                   | This study         |
| Cosmid- $\Delta$ <i>CobB1</i>                        | cosmid containing <i>SccobB1::aac(3)IV</i>                                            | This study         |
| Cosmid- $\Delta$ <i>CobB2</i>                        | cosmid containing <i>SccobB2::aac(3)IV</i>                                            | This study         |
| Cosmid- $\Delta$ <i>ParB</i>                         | cosmid containing <i>parB::neo</i>                                                    | This study         |
| pSET152a- <i>parB-eGFP</i>                           | Chromosome integration plasmid for <i>parB-egfp</i>                                   | This study         |
| pSET152a- <i>parB</i> <sup>K183Q</sup> - <i>eGFP</i> | Chromosome integration plasmid for <i>parB</i> <sup>K183Q</sup> - <i>egfp</i>         | This study         |
| pSET152a- <i>parB</i> <sup>K183R</sup> - <i>eGFP</i> | Chromosome integration plasmid for <i>parB</i> <sup>K183R</sup> - <i>egfp</i>         | This study         |
| pET-28b- <i>Scpat</i>                                | <i>ScPat</i> expression clone                                                         | This work          |
| pET-28b- <i>SccobB1</i>                              | <i>ScCobB1</i> expression clone                                                       | This work          |
| pET-28b- <i>SccobB2</i>                              | <i>ScCobB2</i> expression clone                                                       | This work          |
| pET-28b- <i>parB</i>                                 | <i>ParB</i> expression clone                                                          | This work          |
| pET-28b- <i>parB</i> <sup>K183Q</sup>                | <i>ParB</i> <sup>K183Q</sup> expression clone                                         | This study         |
| pET-28b- <i>parB</i> <sup>K183R</sup>                | <i>ParB</i> <sup>K183R</sup> expression clone                                         | This study         |
| pET-28b- <i>parB</i> <sup>K187Q</sup>                | <i>ParB</i> <sup>K187Q</sup> expression clone                                         | This study         |
| pET-28b- <i>parB</i> <sup>K187R</sup>                | <i>ParB</i> <sup>K187R</sup> expression clone                                         | This study         |
| pET-28b- <i>parB</i> <sup>K183A</sup>                | <i>ParB</i> <sup>K183A</sup> expression clone                                         | This study         |
| pET-28b- <i>parB</i> <sup>K187A</sup>                | <i>ParB</i> <sup>K187A</sup> expression clone                                         | This study         |

294

295

296

297



**Table S3. Primers used in this study.**

| <b>Primers name</b> | <b>Sequences (5'-3')</b>                                                    |
|---------------------|-----------------------------------------------------------------------------|
| parB-3887-M-F       | TTGCCTCGGCGGCCTTGGGGAGCGCGGCTTCTGCGGCCCC<br>TGGGGCGATG ATTCCGGGGATCCGTCGACC |
| parB-3887-M-R       | CGCTCCTACGGCAGTCGGAGCGCCCCTGGACGCTCCGCCT<br>ACCGGAGTCA TGTAGGCTGGAGCTGCTTC  |
| parB-3887-C-F       | AGGGGACCCAGTGAGTGAG                                                         |
| parB-3887-C-R       | GGTATGCACCCGGACACAGTC                                                       |
| pat-5842-M-F:       | g'gcgccgtgtcgtacgcgagccgtactctggggcccatgATTCCGGGGATCCGT<br>CGACC            |
| pat-5842-M-R:       | ggcacgggcaccggccgggtacggggcgtggcgggtcaTGTAGGCTGGAGC<br>TGCTTC               |
| pat-5842-C-F:       | tcagaggcgtgaagttgtc                                                         |
| pat-5842-C-R:       | gttctggtcgaacctgtgtct                                                       |
| cobB-0452-M-F:      | cgcggggaccgcggcgttccgtacccttgcgcgatgATTCCGGGGATCCGT<br>CGACC                |
| cobB-0452-M-R:      | agatttccggtcccgtgcgcgacgcgggctgcctgggtcaTGTAGGCTGGAGCTG<br>CTTC             |
| cobB-0452-C-F:      | tggacagtcaagtctgtca                                                         |
| cobB-0452-C-R:      | ccgttgacgagttcttgat                                                         |
| cobB-6464-M-F:      | cgataaccgttcgccggccgacccccggcggccctaccctcgaccgatgATTCCGGG<br>GATCCGTCGACC   |
| cobB-6464-M-R:      | cgacgcctgttctgacggcctgcggcttccggtccagccgcgggtcaTGTAGGCTG<br>GAGCTGCTTC      |
| cobB-6464-C-F:      | tgactacgccacctacatcg                                                        |
| cobB-6464-C-R:      | gcgactactacgccttacc                                                         |
| ParB-his-M-F        | TGCAGAAGGGCCTTCTGGAGGGCGAGGACGAGGACGGGG<br>ACGCCGAGTCCCACCACCACCACCACCA     |
| ParB-his-M-R        | CGTTCGCATGGCCCCTGCCTTCCTCCCAGAGGTACCGCCA<br>GGTGACAACGATTCCGGGGATCCGTCGACC  |
| ParB-his-C-F        | gtccacagctccttccgtag                                                        |
| ParB-his-C-R        | accaacttgccatctgaag                                                         |
| His-apr-F           | CACCACCACCACCACCACCACCACCACCACCACCTGAT<br>GTAGGCTGGAGCTGCTTC                |
| His-apr-R           | ATTCCGGGGATCCGTCGACC                                                        |
| parB-E-F            | GCTCTAGACATCATCATCATCACAGCAGCGGCatgccgt<br>gctaccgaacga                     |
| parB-E-R            | CGGAATTCTcaggactcggcgtccccgtcct                                             |
| cobB-6464-E-F:      | cccAAGCTTatgaccggcaagcctctcg                                                |
| cobB-6464-E-R:      | gcTCTAGATcagcccagcccgcgca                                                   |
| cobB-0452-E-F:      | cccAAGCTTatgcgatgcgccccactc                                                 |
| cobB-0452-E-R:      | gcTCTAGATcagggcgtcgccggtccC                                                 |
| pat-5842-E-F:       | ggGATATCatgcagacctcgtggaccg                                                 |
| pat-5842-E-R:       | gcTCTAGATcagtagccggcagggtcc                                                 |

|                          |                                        |
|--------------------------|----------------------------------------|
| parS-H-F                 | AGGCATACAAGCACCTGCTGGAGCTTCGCC         |
| parS-H-R                 | FAM-CGAGACGGAGTGCCGGAAGGTCGACGGAGC     |
| ParB <sup>K187Q</sup> -F | CAAGTGCAGAACCCGGGTGGC                  |
| ParB <sup>K187R</sup> -F | CGTGTGCAGAACCCGGGTGGC                  |
| ParB <sup>K183Q</sup> -F | CAACTCTCCCCGAAGGTGCAGAACC              |
| ParB <sup>K183R</sup> -F | CGTCTCTCCCCGAAGGTGCAGAACC              |
| ParB <sup>K187A</sup> -F | GCGGTGCAGAACCCGGGTGGC                  |
| ParB <sup>K187A</sup> -F | GCGCTCTCCCCGAAGGTGCA                   |
| ParB <sup>K183-R</sup>   | CAGCAGACGCAGGGTGTGG                    |
| ParB <sup>K187-R</sup>   | CGGGGAGAGCTTCAGCAGAC                   |
| ParB-promotor-F          | GAAGATCTTACTCCACACAAGCTGCCCT           |
| ParB-promotor-R          | TCGTTCGGTAGCAGCGGCATGACCCGGGTCTGCTCGGG |
| EGFP-ParB-F              | ATGCCGCTGCTACCGAACGA                   |
| EGFP-ParB-R              | gtggcgaccTCTAGActgtacagctcgtccatgc     |
| EGFP-F                   | TCTAGAggtcgccacCCGCTGCTACCGAACGAGCG    |
| EGFP-R                   | cgGAATTCcaGGACTCGGCGTCCCCGTCCT         |
| ParB-C-F                 | GACTTCAACTGCACGCATGA                   |
| ParB-C-R                 | ttactgtacagctcgtccatgc                 |
| ParB-tran-F              | cttcttctggacgcgctc                     |
| ParB-tran-R              | tcatgcgtgcagttgaagtc                   |
| Cobb1-tran-F             | gtgatcaccagaacgtcga                    |
| Cobb1-tran-R             | cgcaggacagacagacga                     |
| Pat-tran-F               | gtgtccacctcgtctcctc                    |
| Pat-tran-R               | ggactccaggtacatcagcg                   |
| HrdB-tran-F              | tggtcgaggtcatcaacaag                   |
| HrdB-tran-R              | tggacctcgatgacctctc                    |

---

299

300

301

302 ***parS* probe used in this study**

303 AGGCATACAAGCACCTGCTGGAGCTTCGCCTGGAGAACGGGCCGATGGAGCACG

304 ACGCGGCGGTGGCAGCACTGAAGGAATGGTGGGCTCAGACCCGGACAACGCAT

305 GAGAACGGGCGGCACGTTTCACGTGAAACGTGCCGCCGCGGGTCAATGTTTCACG

306 TGAAACATGACCGTGAAGCAGAACACGGAGAGTGGTCTGTGCCTCAGGCCTCGC

307 CGAGGCAGAGCAGGAACTCTTACCGTCGCCGGTTTCGGCGTAGAAGCCGGTGG

308 CTCCGTCGACCTTCCGGCACTCCGTCTCG

309

310 About 200k Dalton. The two copies of reverse complementary sequences in probe are  
311 highlighted in green.

312

313

314

315

316

317 **Supplemental References**

318

- 319 1. Gust, B., Challis, G.L., Fowler, K., Kieser, T. and Chater, K.F. (2003) PCR-targeted *Streptomyces*  
320 gene replacement identifies a protein domain needed for biosynthesis of the sesquiterpene  
321 soil odor geosmin. *Proc Natl Acad Sci U S A*, **100**, 1541-1546.
- 322 2. Datsenko, K.A. and Wanner, B.L. (2000) One-step inactivation of chromosomal genes in  
323 *Escherichia coli* K-12 using PCR products. *Proceedings of the National Academy of Sciences of*  
324 *the United States of America*, **97**, 6640-6645.
- 325 3. Hone, D., Morona, R., Attridge, S. and Hackett, J. (1987) Construction of defined galE mutants  
326 of Salmonella for use as vaccines. *J Infect Dis*, **156**, 167-174.
- 327 4. Bentley, S.D., Chater, K.F., Cerdeno-Tarraga, A.M., Challis, G.L., Thomson, N.R., James, K.D.,  
328 Harris, D.E., Quail, M.A., Kieser, H., Harper, D. *et al.* (2002) Complete genome sequence of the  
329 model actinomycete *Streptomyces coelicolor* A3(2). *Nature*, **417**, 141-147.
- 330 5. Kuhstoss, S., Richardson, M.A. and Rao, R.N. (1991) Plasmid cloning vectors that integrate site-  
331 specifically in *Streptomyces* spp. *Gene*, **97**, 143-146.
- 332 6. Sun, J., Kelemen, G.H., Fernandez-Abalos, J.M. and Bibb, M.J. (1999) Green fluorescent protein  
333 as a reporter for spatial and temporal gene expression in *Streptomyces coelicolor* A3(2).  
334 *Microbiology*, **145 ( Pt 9)**, 2221-2227.

335
